# Supplementary material for: Detecting and distinguishing between apicultural plants using UAV multispectral imaging
Source: PeerJ. 2023 Apr 14;11:e15065. doi: 10.7717/peerj.15065 (PMC10108856; doi:10.7717/peerj.15065)
Supplement: Supplemental Information 2 [file peerj-11-15065-s002.xlsx]

## Sheet: Original
		Classes												Training samples	Validation samples
		Sacropoterium			Thyme			Other
Bands	Classifier	PA	UA	fscore	PA	UA	fscore	PA	UA	fscore	OA %	Kappa	f-score(average)
VIS	RFT	0.981481	0.985777	0.983624	0.97093	0.95977	0.965318	0.950495	0.956811	0.953642	0.967622	0.951418	0.967528	6313	2687
	CART	0.978214	0.975027	0.976618	0.952326	0.954545	0.953434	0.937294	0.938326	0.93781	0.956085	0.934099	0.955954
	GTB	0.978214	0.972914	0.975557	0.972093	0.956522	0.964245	0.935094	0.955056	0.944969	0.961667	0.942485	0.96159
	MMD	0.942266	0.997693	0.969188	0.830233	0.97541	0.896985	0.977998	0.817096	0.890336	0.918496	0.877547	0.918836
	SVM	1	0.567718	0.72426	0	0.679439	0.753368	0	0	NaN	0.612207	0.418558	0.738814
VIS + NIR	RFT	0.995643	0.991323	0.993478	0.987209	0.960407	0.973624	0.958196	0.988649	0.973184	0.980275	0.970408	0.980095
	CART	0.984749	0.990142	0.987439	0.962791	0.949541	0.95612	0.949395	0.956763	0.953065	0.965761	0.948628	0.965541
	GTB	0.992375	0.990217	0.991295	0.987209	0.963678	0.975302	0.959296	0.984199	0.971588	0.979531	0.969291	0.979395
	MMD	0.940087	0.998843	0.968575	0.848837	0.983827	0.911361	0.985699	0.828862	0.900503	0.926312	0.889301	0.926813
	SVM	0.730937	0.727766	0.729348	0.986047	0.792523	0.878756	0.537954	0.703597	0.609726	0.747302	0.621606	0.739277
VIS + NIR + RE	RFT	0.996732	0.991333	0.994025	0.987209	0.960407	0.973624	0.958196	0.989773	0.973728	0.980648	0.970966	0.980459
	CART	0.98366	0.986885	0.98527	0.961628	0.945143	0.953314	0.943894	0.956522	0.950166	0.963156	0.94472	0.962917
	GTB	0.993464	0.991304	0.992383	0.987209	0.963678	0.975302	0.959296	0.984199	0.971588	0.979903	0.969849	0.979757
	MMD	0.929194	0.998829	0.962754	0.830233	0.983471	0.900378	0.985699	0.809395	0.888889	0.916636	0.874747	0.91734
	SVM	0.721133	0.738016	0.729477	0.983721	0.784787	0.873065	0.546755	0.698034	0.613202	0.746185	0.619982	0.738581
VEG.INDICES	RFT	0.993464	0.994547	0.994005	0.975581	0.922992	0.948559	0.924092	0.97561	0.949153	0.964272	0.946414	0.963905
	CART	0.989107	0.985885	0.987493	0.92093	0.919861	0.920395	0.925193	0.929282	0.927233	0.945664	0.918464	0.94504
	GTB	0.995643	0.993478	0.994559	0.973256	0.927938	0.950057	0.927393	0.974566	0.950395	0.965389	0.948084	0.965004
	MMD	0.734205	1	0.846734	0.617442	0.953321	0.749471	0.971397	0.606456	0.746723	0.777075	0.664595	0.780976
	SVM	0.996732	0.992408	0.994565	0.990698	0.894958	0.940397	0.888889	0.99385	0.938444	0.958318	0.937509	0.957802
ALL BANDS + VE. INDICES	RFT	0.996732	0.995647	0.996189	0.984884	0.960317	0.972445	0.962596	0.987585	0.97493	0.981392	0.972083	0.981188
	CART	0.990196	0.989119	0.989657	0.976744	0.961098	0.968858	0.962596	0.978747	0.970605	0.976554	0.964821	0.976373
	GTB	0.995643	0.991323	0.993478	0.990698	0.963801	0.977064	0.962596	0.99319	0.977654	0.982881	0.974316	0.982732
	MMD	0.918301	1	0.957411	0.9	0.984733	0.940462	0.987899	0.848771	0.913066	0.935988	0.903884	0.936979
	SVM	0.996732	0.992408	0.994565	0.993023	0.921251	0.955792	0.918592	0.99642	0.955924	0.969111	0.953678	0.96876
STUDY AREA 2
Bands	Classifier	PA	UA	fscore	PA	UA	fscore	PA	UA	fscore	OA	Kappa	f-score(average)	Training	Validation
VIS	RFT	0.947983	0.970652	0.959184	0.899289	0.839602	0.868421	0.861079	0.90036	0.880282	0.904027	0.855981	0.902629	6343	2657
	CART	0.943737	0.936776	0.940243	0.824645	0.816901	0.820755	0.835821	0.850467	0.84308	0.870531	0.805573	0.868026
	GTB	0.951168	0.968649	0.959829	0.882701	0.836139	0.85879	0.857635	0.888228	0.872664	0.898758	0.848051	0.897094
	MMD	0.915074	0.982896	0.947774	0.677725	0.913738	0.778231	0.946039	0.714038	0.813827	0.849831	0.774439	0.846611
	SVM	0.987261	0.535098	0.69403	0.439573	0.883333	0.587025	0.501722	0.875752	0.637956	0.654121	0.472998	0.63967
VIS + NIR	RFT	0.968153	0.975401	0.971763	0.953791	0.873102	0.911665	0.881745	0.96	0.91921	0.935265	0.902846	0.934213
	CART	0.94586	0.961165	0.953451	0.880332	0.844318	0.861949	0.869116	0.890588	0.879721	0.899887	0.849732	0.898374
	GTB	0.963907	0.972163	0.968017	0.943128	0.868048	0.904032	0.879449	0.950372	0.913536	0.92962	0.894372	0.928528
	MMD	0.946921	0.960172	0.953501	0.651659	0.956522	0.775194	0.952928	0.719861	0.820158	0.8551	0.782119	0.849618
	SVM	0.860934	0.951878	0.904125	0.901659	0.592679	0.715226	0.505166	0.84453	0.632184	0.757245	0.636882	0.750511
VIS + NIR + RE	RFT	0.967091	0.97957	0.973291	0.958531	0.870829	0.912578	0.879449	0.9599	0.917915	0.935642	0.903422	0.934594
	CART	0.952229	0.954255	0.953241	0.895735	0.857143	0.876014	0.867968	0.905389	0.886284	0.906662	0.859875	0.90518
	GTB	0.964968	0.972193	0.968567	0.944313	0.874863	0.908262	0.887486	0.953144	0.919144	0.933007	0.899451	0.931991
	MMD	0.946921	0.93501	0.940928	0.63981	0.954064	0.765957	0.936854	0.717678	0.812749	0.846067	0.768437	0.839878
	SVM	0.86518	0.954333	0.907572	0.909953	0.597201	0.721127	0.507463	0.854932	0.636888	0.762138	0.644194	0.755196
VEG.INDICES	RFT	0.952229	0.948203	0.950212	0.885071	0.825414	0.854202	0.82434	0.890819	0.856291	0.888973	0.833326	0.886902
	CART	0.895966	0.929515	0.912432	0.803318	0.780207	0.791594	0.802526	0.794318	0.798401	0.835905	0.753751	0.834142
	GTB	0.946921	0.945917	0.946419	0.883886	0.829811	0.855995	0.825488	0.882209	0.852906	0.887091	0.830502	0.885107
	MMD	0.946921	0.945917	0.946419	0.598341	0.90991	0.721944	0.924225	0.694564	0.793103	0.828754	0.74242	0.820489
	SVM	0.961783	0.939834	0.950682	0.905213	0.800839	0.849833	0.777268	0.916103	0.840994	0.883327	0.824852	0.880503
ALL BANDS + VE. INDICES	RFT	0.957537	0.977248	0.967292	0.950237	0.88521	0.916571	0.894374	0.940821	0.91701	0.934513	0.901725	0.933625
	CART	0.950106	0.96444	0.957219	0.877962	0.873821	0.875887	0.895522	0.885358	0.890411	0.909296	0.863828	0.907839
	GTB	0.961783	0.974194	0.967949	0.949052	0.88022	0.913341	0.89093	0.949816	0.919431	0.934513	0.901717	0.933574
	MMD	0.946921	0.972737	0.959656	0.645735	0.964602	0.773598	0.972445	0.720851	0.827957	0.859616	0.788936	0.853737
	SVM	0.958599	0.954545	0.956568	0.918246	0.808133	0.859678	0.794489	0.920213	0.852742	0.891983	0.837896	0.889663
STUDY AREA 3
		PA	UA	fscore	PA	UA	fscore	PA	UA	fscore	OA	Kappa	f-score(average)	Training	Validation
VIS	RFT	0.924672	0.934879	0.929748	0.902944	0.921023	0.911894	0.921437	0.893362	0.907182	0.9163	0.874457	0.916275	6276	2724
	CART	0.907205	0.905229	0.906216	0.87132	0.878988	0.875137	0.877666	0.871795	0.87472	0.885463	0.828184	0.885358
	GTB	0.926856	0.928884	0.927869	0.905125	0.921199	0.913091	0.915825	0.89769	0.906667	0.915932	0.873899	0.915876
	MMD	0.780568	0.984848	0.870889	0.605234	0.992844	0.752033	0.994388	0.615705	0.760515	0.791483	0.688084	0.794479
	SVM	0.974891	0.567344	0.717269	0.739368	0.889764	0.807624	0.433221	0.994845	0.603597	0.718429	0.576543	0.709496
VIS + NIR	RFT	0.949782	0.95815	0.953947	0.953108	0.956236	0.95467	0.948373	0.936807	0.942554	0.950441	0.925658	0.95039
	CART	0.927948	0.926936	0.927441	0.923664	0.944259	0.933848	0.924804	0.905495	0.915047	0.925477	0.888217	0.925445
	GTB	0.951965	0.95719	0.95457	0.952017	0.957237	0.95462	0.948373	0.937847	0.94308	0.950808	0.926209	0.950757
	MMD	0.929039	0.920996	0.925	0.621592	0.996503	0.765615	0.927048	0.672638	0.779613	0.82489	0.737777	0.823409
	SVM	0.91048	0.934978	0.922566	0.97928	0.633286	0.769165	0.448934	0.966184	0.613027	0.782673	0.673159	0.768253
VIS + NIR + RE	RFT	0.95524	0.958379	0.956807	0.953108	0.957284	0.955191	0.94725	0.939866	0.943544	0.951909	0.92786	0.951847
	CART	0.93559	0.942794	0.939178	0.934569	0.942794	0.938664	0.933782	0.918322	0.925988	0.934655	0.901981	0.93461
	GTB	0.956332	0.955289	0.95581	0.95747	0.955386	0.956427	0.942761	0.945946	0.944351	0.952276	0.928407	0.952196
	MMD	0.932314	0.923243	0.927757	0.565976	0.996161	0.721836	0.931538	0.649452	0.76533	0.808737	0.713664	0.804974
	SVM	0.896288	0.940435	0.917831	0.976009	0.629395	0.765284	0.45679	0.948718	0.616667	0.779369	0.668215	0.766594
VEG.INDICES	RFT	0.911572	0.908596	0.910082	0.895311	0.872476	0.883746	0.813692	0.83912	0.826211	0.874082	0.81108	0.873346
	CART	0.885371	0.88828	0.886823	0.859324	0.863089	0.861202	0.794613	0.788419	0.791504	0.846916	0.770363	0.84651
	GTB	0.912664	0.910675	0.911668	0.897492	0.876464	0.886853	0.819304	0.841984	0.830489	0.877019	0.815489	0.876337
	MMD	0.944323	0.863273	0.901981	0.655398	0.917557	0.764631	0.805836	0.672915	0.733401	0.801762	0.702897	0.800005
	SVM	0.922489	0.919478	0.920981	0.95747	0.796011	0.869307	0.701459	0.890313	0.784683	0.861968	0.792728	0.858324
ALL BANDS + VE. INDICES	RFT	0.946507	0.958011	0.952224	0.956379	0.950163	0.953261	0.946128	0.940848	0.943481	0.949706	0.924555	0.949655
	CART	0.925764	0.937017	0.931356	0.942203	0.93913	0.940664	0.921437	0.913237	0.917318	0.929883	0.894819	0.92978
	GTB	0.957424	0.957424	0.957424	0.956379	0.955338	0.955858	0.945006	0.946067	0.945536	0.95301	0.929509	0.952939
	MMD	0.93559	0.942794	0.939178	0.654308	0.993377	0.788955	0.95174	0.700248	0.806851	0.846182	0.76964	0.844994
	SVM	0.931223	0.942541	0.936848	0.960742	0.875746	0.916277	0.836139	0.916359	0.874413	0.910059	0.865021	0.909179

## Sheet: AVE_classifier
		Sacropoterium			Thyme			Other
Bands	Classifier	PA	CA	fscore	PA	CA	fscore	PA	CA	fscore	OA	Kappa		SVM		RF		Mahalanobid		GTB		CART
VIS	SVM	0.987384	0.55672	0.711853	0.39298	0.817512	0.716006	0.311648	0.623532	0.620776	0.661586	0.489366		oa	kappa	oa	kappa	oa	kappa	oa	kappa	oa	kappa
VIS + NIR	SVM	0.834117	0.87154	0.852013	0.955662	0.67283	0.787716	0.497351	0.838103	0.618312	0.762406	0.643882		0.802296	0.702921	0.941004	0.91148	0.852462	0.778566	0.940094	0.910109	0.916793	0.875137
VIS + NIR + RE	SVM	0.827534	0.877594	0.851627	0.956561	0.670461	0.786492	0.503669	0.833895	0.622252	0.762564	0.64413
VEGETATION INDICES	SVM	0.960335	0.950573	0.955409	0.951127	0.830602	0.886512	0.789205	0.933422	0.854707	0.901204	0.851696
ALL BANDS + VEGETATION INDICES	SVM	0.962184	0.963165	0.96266	0.957337	0.868377	0.910582	0.84974	0.944331	0.89436	0.923718	0.885532
VIS	RFT	0.951379	0.963769	0.957519	0.924388	0.906798	0.915211	0.911004	0.916844	0.913702	0.929316	0.893952
VIS + NIR	RFT	0.971192	0.974958	0.973063	0.964703	0.929915	0.946653	0.929438	0.961819	0.944983	0.955327	0.932971
VIS + NIR + RE	RFT	0.973021	0.976427	0.974708	0.966283	0.929507	0.947131	0.928298	0.96318	0.945062	0.956066	0.934083
VEGETATION INDICES	RFT	0.952422	0.950449	0.951433	0.918654	0.873628	0.895502	0.854042	0.90185	0.877218	0.909109	0.863606
ALL BANDS + VEGETATION INDICES	RFT	0.966925	0.976969	0.971902	0.963833	0.931897	0.947426	0.934366	0.956418	0.94514	0.955204	0.932787
VIS	mahalanobis	0.879303	0.988479	0.929283	0.704397	0.960664	0.809083	0.972808	0.715613	0.821559	0.85327	0.780023
VIS + NIR	mahalanobis	0.938683	0.960003	0.949025	0.707363	0.978951	0.81739	0.955225	0.740454	0.833425	0.868767	0.803066
VIS + NIR + RE	mahalanobis	0.936143	0.952361	0.943813	0.678673	0.977899	0.796057	0.951363	0.725508	0.822323	0.857147	0.785616
VEGETATION INDICES	mahalanobis	0.87515	0.936397	0.898378	0.623727	0.92693	0.745349	0.900486	0.657978	0.757743	0.80253	0.703304
ALL BANDS + VEGETATION INDICES	mahalanobis	0.933604	0.971844	0.952081	0.733347	0.980904	0.834338	0.970695	0.756623	0.849291	0.880595	0.82082
VIS	GradientTreeBoost	0.952079	0.956816	0.954418	0.919973	0.90462	0.912042	0.902851	0.913658	0.9081	0.925453	0.888145
VIS + NIR	GradientTreeBoost	0.969415	0.97319	0.971294	0.960785	0.929654	0.944651	0.929039	0.957473	0.942735	0.95332	0.929957
VIS + NIR + RE	GradientTreeBoost	0.971588	0.972929	0.972253	0.962997	0.931309	0.946664	0.929848	0.961096	0.945027	0.955062	0.932569
VEGETATION INDICES	GradientTreeBoost	0.951743	0.950024	0.950882	0.918211	0.878071	0.897635	0.857395	0.899586	0.87793	0.909833	0.864692
ALL BANDS + VEGETATION INDICES	GradientTreeBoost	0.971617	0.974313	0.97295	0.965376	0.933119	0.948754	0.932844	0.963024	0.94754	0.956801	0.935181
VIS	CART	0.943052	0.93901	0.941026	0.882763	0.883478	0.883109	0.883593	0.886863	0.885203	0.904026	0.855952
VIS + NIR	CART	0.952852	0.959414	0.95611	0.922262	0.912706	0.917306	0.914438	0.917615	0.915944	0.930375	0.895526
VIS + NIR + RE	CART	0.95716	0.961312	0.95923	0.930644	0.915027	0.922664	0.915215	0.926744	0.920813	0.934824	0.902192
VEGETATION INDICES	CART	0.923481	0.93456	0.928916	0.861191	0.854385	0.85773	0.840777	0.83734	0.839046	0.876162	0.814193
ALL BANDS + VEGETATION INDICES	CART	0.955355	0.963525	0.959411	0.932303	0.924683	0.92847	0.926518	0.925781	0.926111	0.938578	0.907823

## Sheet: AVE_bands
		Sacropoterium			Thyme			Other
Bands	Classifier	PA	CA	fscore	PA	CA	fscore	PA	CA	fscore	OA	Kappa		ALL BANDS + VEGETATION INDICES		VEGETATION INDICES		VIS		VIS + NIR		VIS + NIR + RE
ALL BANDS + VEGETATION INDICES	SVM	0.962184	0.963165	0.96266	0.957337	0.868377	0.910582	0.84974	0.944331	0.89436	0.923718	0.885532		oa	kappa	oa	kappa	oa	kappa	oa	kappa	oa	kappa
ALL BANDS + VEGETATION INDICES	RFT	0.966925	0.976969	0.971902	0.963833	0.931897	0.947426	0.934366	0.956418	0.94514	0.955204	0.932787		0.930979	0.896429	0.879768	0.819498	0.85473	0.781488	0.894039	0.84108	0.893133	0.839718
ALL BANDS + VEGETATION INDICES	mahalanobis	0.933604	0.971844	0.952081	0.733347	0.980904	0.834338	0.970695	0.756623	0.849291	0.880595	0.82082
ALL BANDS + VEGETATION INDICES	GradientTreeBoost	0.971617	0.974313	0.97295	0.965376	0.933119	0.948754	0.932844	0.963024	0.94754	0.956801	0.935181
ALL BANDS + VEGETATION INDICES	CART	0.955355	0.963525	0.959411	0.932303	0.924683	0.92847	0.926518	0.925781	0.926111	0.938578	0.907823
VEGETATION INDICES	SVM	0.960335	0.950573	0.955409	0.951127	0.830602	0.886512	0.789205	0.933422	0.854707	0.901204	0.851696
VEGETATION INDICES	RFT	0.952422	0.950449	0.951433	0.918654	0.873628	0.895502	0.854042	0.90185	0.877218	0.909109	0.863606
VEGETATION INDICES	mahalanobis	0.87515	0.936397	0.898378	0.623727	0.92693	0.745349	0.900486	0.657978	0.757743	0.80253	0.703304
VEGETATION INDICES	GradientTreeBoost	0.951743	0.950024	0.950882	0.918211	0.878071	0.897635	0.857395	0.899586	0.87793	0.909833	0.864692
VEGETATION INDICES	CART	0.923481	0.93456	0.928916	0.861191	0.854385	0.85773	0.840777	0.83734	0.839046	0.876162	0.814193
VIS	SVM	0.987384	0.55672	0.711853	0.39298	0.817512	0.716006	0.311648	0.623532	0.620776	0.661586	0.489366
VIS	RFT	0.951379	0.963769	0.957519	0.924388	0.906798	0.915211	0.911004	0.916844	0.913702	0.929316	0.893952
VIS	mahalanobis	0.879303	0.988479	0.929283	0.704397	0.960664	0.809083	0.972808	0.715613	0.821559	0.85327	0.780023
VIS	GradientTreeBoost	0.952079	0.956816	0.954418	0.919973	0.90462	0.912042	0.902851	0.913658	0.9081	0.925453	0.888145
VIS	CART	0.943052	0.93901	0.941026	0.882763	0.883478	0.883109	0.883593	0.886863	0.885203	0.904026	0.855952
VIS + NIR	SVM	0.834117	0.87154	0.852013	0.955662	0.67283	0.787716	0.497351	0.838103	0.618312	0.762406	0.643882
VIS + NIR	RFT	0.971192	0.974958	0.973063	0.964703	0.929915	0.946653	0.929438	0.961819	0.944983	0.955327	0.932971
VIS + NIR	mahalanobis	0.938683	0.960003	0.949025	0.707363	0.978951	0.81739	0.955225	0.740454	0.833425	0.868767	0.803066
VIS + NIR	GradientTreeBoost	0.969415	0.97319	0.971294	0.960785	0.929654	0.944651	0.929039	0.957473	0.942735	0.95332	0.929957
VIS + NIR	CART	0.952852	0.959414	0.95611	0.922262	0.912706	0.917306	0.914438	0.917615	0.915944	0.930375	0.895526
VIS + NIR + RE	SVM	0.827534	0.877594	0.851627	0.956561	0.670461	0.786492	0.503669	0.833895	0.622252	0.762564	0.64413
VIS + NIR + RE	RFT	0.973021	0.976427	0.974708	0.966283	0.929507	0.947131	0.928298	0.96318	0.945062	0.956066	0.934083
VIS + NIR + RE	mahalanobis	0.936143	0.952361	0.943813	0.678673	0.977899	0.796057	0.951363	0.725508	0.822323	0.857147	0.785616
VIS + NIR + RE	GradientTreeBoost	0.971588	0.972929	0.972253	0.962997	0.931309	0.946664	0.929848	0.961096	0.945027	0.955062	0.932569
VIS + NIR + RE	CART	0.95716	0.961312	0.95923	0.930644	0.915027	0.922664	0.915215	0.926744	0.920813	0.934824	0.902192
